# Supplementary material for: Zwitterionic copolymers bearing phosphonate or phosphonic motifs as novel metal-anchorable anti-fouling coatings
Source: Royal Society of Chemistry journal article supplement (doi:10.1039/c7tb01017f), 2017-01-01
Supplement: c7tb01017f1.pdf [file c7tb01017f1.pdf]

# **Zwitterionic copolymers bearing phosphonate or phosphonic motifs as novel metal-anchorable anti-fouling coatings**

Tao Huang <sup>a</sup>, Hongwei Liu <sup>a</sup>, Peiming Liu <sup>a</sup>, Pingsheng Liu <sup>a,\*</sup>, Li Li <sup>a,\*</sup>, Jian Shen <sup>a,b</sup>

<sup>a</sup> Jiangsu Collaborative Innovation Center of Biomedical Functional Materials, Jiangsu Key Laboratory of Bio-functional Materials, School of Chemistry and Materials Science, Nanjing Normal University, Nanjing 210023, China

<sup>b</sup> School of Chemistry and Chemical Engineering, Nanjing University, Nanjing 210093, China

\* Corresponding authors:

[liups@nju.edu.cn](mailto:liups@nju.edu.cn) (Pingsheng Liu) or [lili3@nju.edu.cn](mailto:lili3@nju.edu.cn) (Li Li)

Tel.: + 86 25 85891536

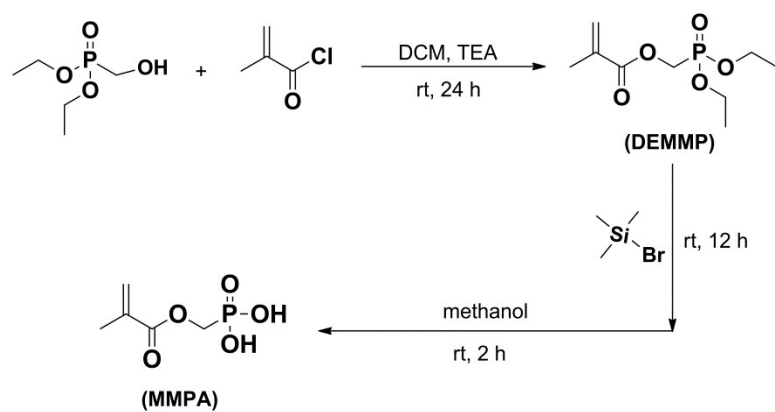

**Fig. S1.** Schematic illustration of the synthetic route of DEMMP and MPA monomers

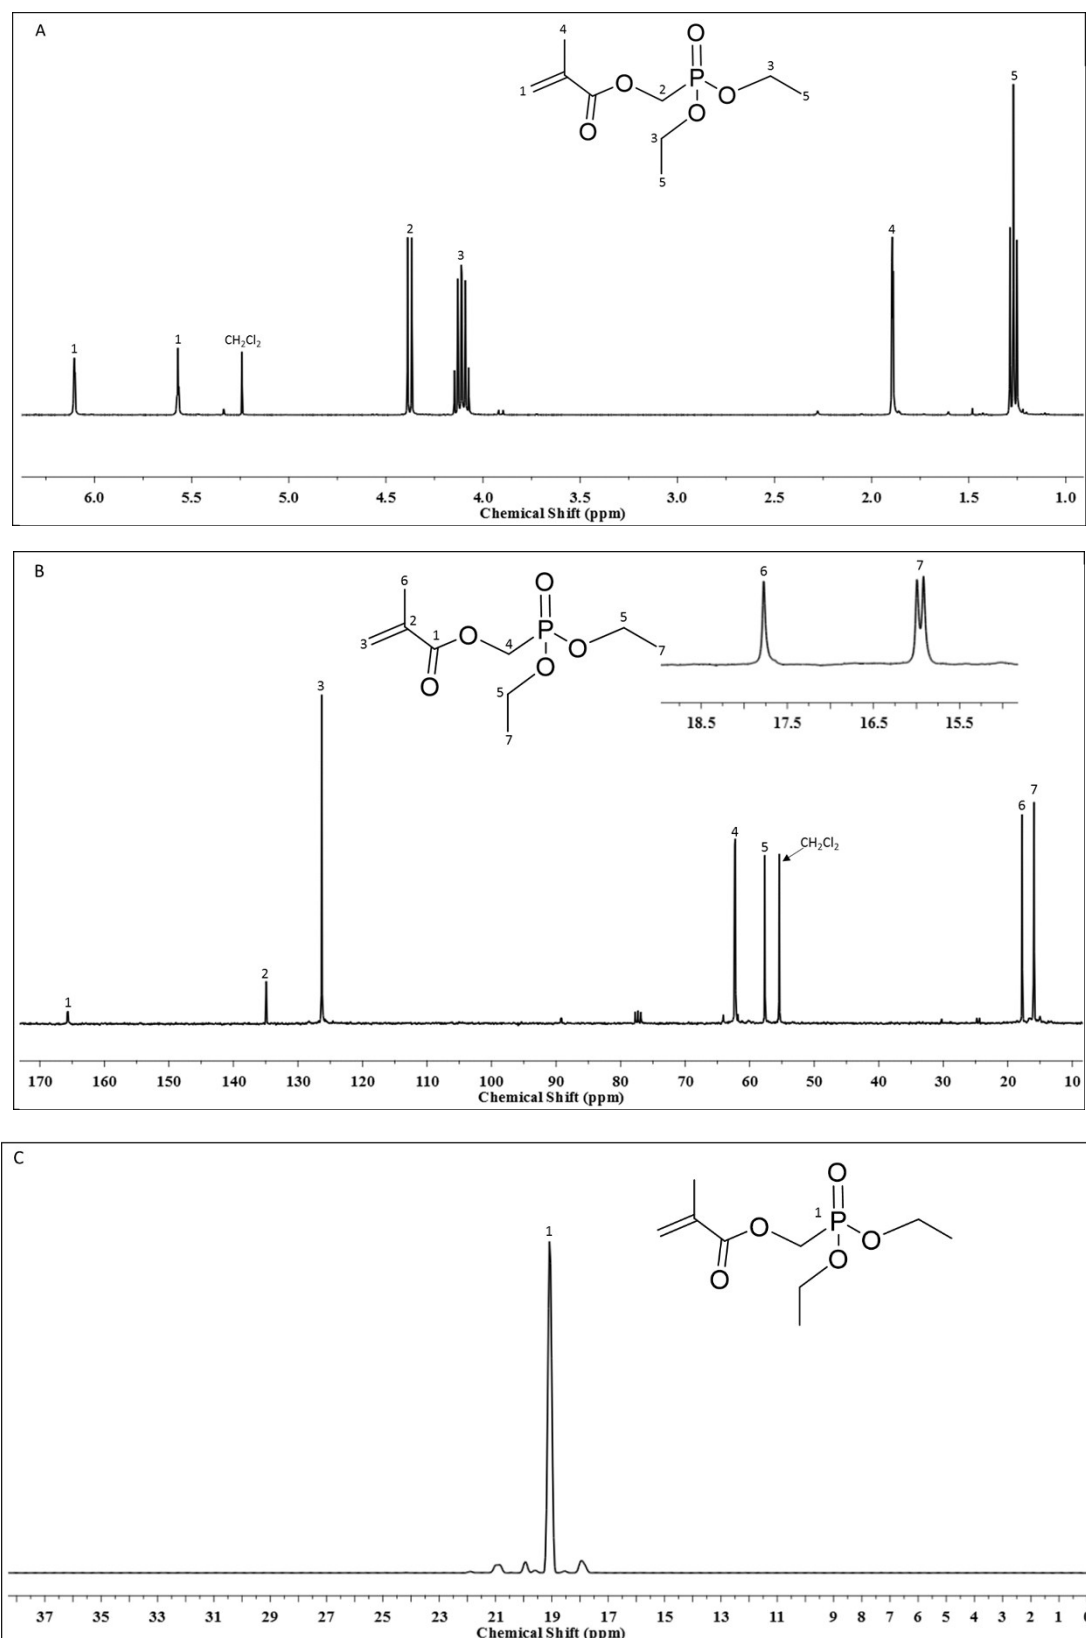

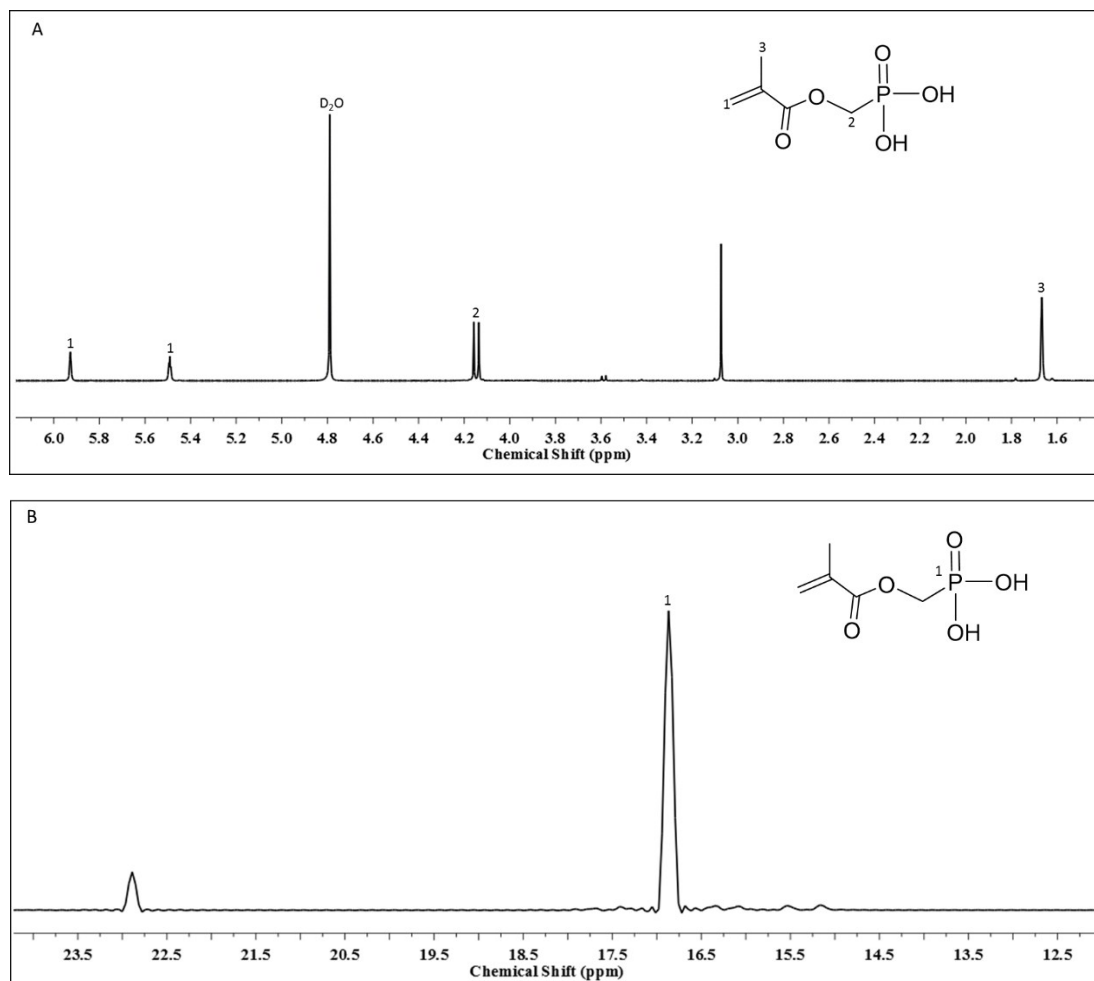

**Fig. S3.**  $^1\text{H}$  NMR (A) and  $^{31}\text{P}$  NMR (B) spectra of MMPA monomer,  $\text{D}_2\text{O}$  as the solvent.

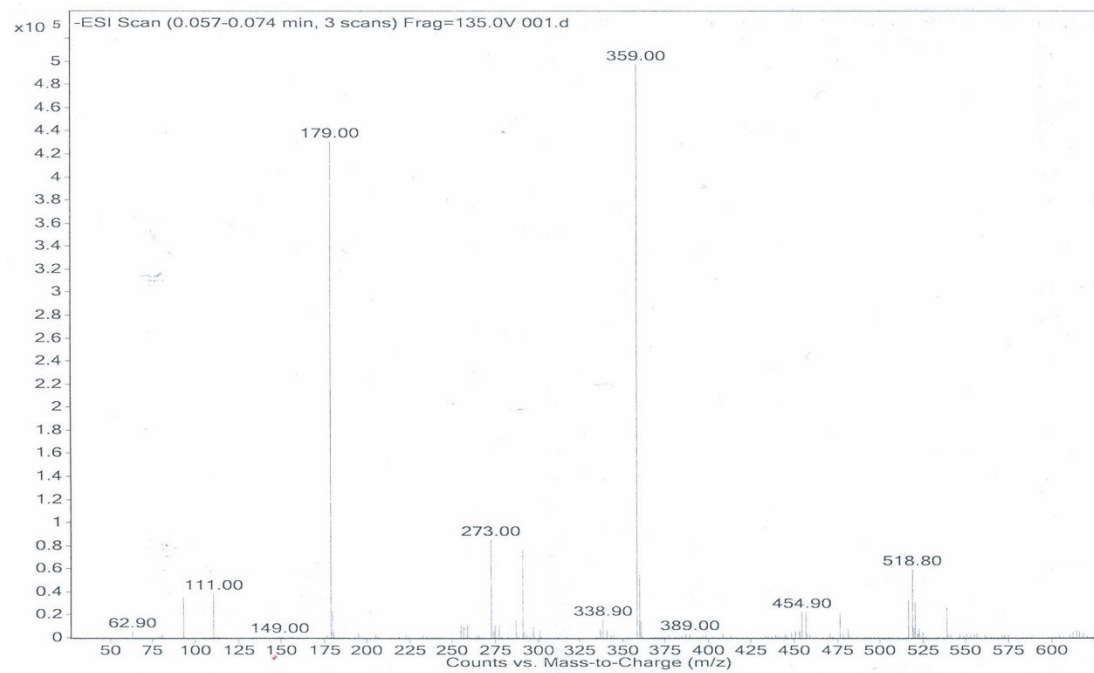

**Fig. S4.** MS spectrum of MMPA monomer
